# Supplementary material for: Association between dietary patterns and premenstrual disorders: a cross-sectional analysis of 1382 college students in China
Source: Royal Society of Chemistry journal article supplement (doi:10.1039/d3fo05782h), 2024-01-01
Supplement: d3fo05782h1.pdf [file d3fo05782h1.pdf]

### Supplementary Information

#### Association between dietary patterns and premenstrual disorders: a cross-sectional analysis of 1382 college students in China

|                                                                                                                                                 |   |
|-------------------------------------------------------------------------------------------------------------------------------------------------|---|
| Table S1. Factor loading matrix of major dietary patterns by principal component analysis with varimax rotation. ....                           | 2 |
| Table S2. Associations between food consumption frequency (measured by days per week) and premenstrual disorders (PMDs).....                    | 3 |
| Table S3. Associations between Traditional South China Diet (TSCD) adherence and premenstrual disorders (PMDs) symptoms (z score). ....         | 4 |
| Table S4. Sensitivity Analysis of the association between Traditional South China Diet (TSCD) adherence and premenstrual disorders (PMDs). .... | 5 |

**Table S1. Factor loading matrix of major dietary patterns by principal component analysis with varimax rotation.**

|                             | <b>Traditional North<br/>China Diet (TNCD)</b> | <b>Traditional South<br/>China Diet (TSCD)</b> | <b>Lacto-ovo Vegetarian Diet<br/>(LVD)</b> |
|-----------------------------|------------------------------------------------|------------------------------------------------|--------------------------------------------|
| <b>Rice</b>                 | -0.08                                          | 0.74                                           | -0.11                                      |
| <b>Wheat</b>                | 0.56                                           | 0.32                                           | -0.04                                      |
| <b>Other staple food</b>    | 0.68                                           | -0.03                                          | 0.13                                       |
| <b>Red meat</b>             | 0.1                                            | 0.71                                           | 0.11                                       |
| <b>Poultry</b>              | 0.27                                           | 0.53                                           | 0.15                                       |
| <b>Fish/seafood</b>         | 0.62                                           | 0.06                                           | 0.22                                       |
| <b>Eggs</b>                 | 0.25                                           | 0.24                                           | 0.48                                       |
| <b>Soy products</b>         | 0.38                                           | 0.28                                           | 0.39                                       |
| <b>Preserved vegetables</b> | 0.66                                           | -0.01                                          | 0.06                                       |
| <b>Fresh vegetables</b>     | -0.07                                          | 0.50                                           | 0.52                                       |
| <b>Fresh fruits</b>         | 0.11                                           | -0.07                                          | 0.75                                       |
| <b>Dairy products</b>       | 0.09                                           | -0.01                                          | 0.71                                       |

Note: 47% cumulative variance was explained in this model.

**Table S2. Associations between food consumption frequency (measured by days per week) and premenstrual disorders (PMDs).**

|                             | <b>Food consumption frequency in participants without PMDs (Mean [SD]), N=1045</b> | <b>Food consumption frequency in participants with PMDs(Mean [SD]), N=337</b> | <b>Crude Model OR (95%CI)</b> | <b>Model 2<sup>a</sup> OR (95%CI)</b> | <b>Model 3<sup>b</sup> OR (95%CI)<sup>a</sup></b> |
|-----------------------------|------------------------------------------------------------------------------------|-------------------------------------------------------------------------------|-------------------------------|---------------------------------------|---------------------------------------------------|
| <b>Rice</b>                 | 5.67 (1.65)                                                                        | 5.48 (1.81)                                                                   | 0.94 (0.88–1.01)              | 0.94 (0.87–1.00)                      | 0.93 (0.87–1.00)                                  |
| <b>Wheat</b>                | 3.38 (2.00)                                                                        | 3.21 (2.01)                                                                   | 0.96 (0.91–1.02)              | 0.96 (0.91–1.02)                      | 0.96 (0.90–1.02)                                  |
| <b>Other staple food</b>    | 1.12 (1.61)                                                                        | 1.22 (1.71)                                                                   | 1.04 (0.96–1.11)              | 1.04 (0.97–1.12)                      | 1.04 (0.97–1.12)                                  |
| <b>Red meat</b>             | 5.15 (2.09)                                                                        | 5.03 (2.13)                                                                   | 0.97 (0.92–1.03)              | 0.97 (0.92–1.03)                      | 0.97 (0.92–1.03)                                  |
| <b>Poultry</b>              | 4.11 (2.17)                                                                        | 3.91 (2.16)                                                                   | 0.96 (0.91–1.01)              | 0.96 (0.91–1.02)                      | 0.96 (0.90–1.01)                                  |
| <b>Fish/seafood</b>         | 1.10 (1.28)                                                                        | 1.13 (1.33)                                                                   | 1.02 (0.92–1.11)              | 1.01 (0.92–1.11)                      | 1.02 (0.93–1.12)                                  |
| <b>Eggs</b>                 | 3.55 (2.40)                                                                        | 3.45 (2.36)                                                                   | 0.98 (0.93–1.04)              | 0.98 (0.93–1.04)                      | 0.98 (0.93–1.04)                                  |
| <b>Soy products</b>         | 3.10 (2.22)                                                                        | 2.93 (2.21)                                                                   | 0.97 (0.91–1.02)              | 0.97 (0.91–1.02)                      | 0.96 (0.91–1.02)                                  |
| <b>Fresh vegetables</b>     | 0.83 (1.28)                                                                        | 0.84 (1.36)                                                                   | 1.01 (0.91–1.10)              | 1.01 (0.91–1.10)                      | 1.01 (0.92–1.10)                                  |
| <b>Preserved vegetables</b> | 5.41 (1.86)                                                                        | 5.44 (1.85)                                                                   | 1.01 (0.94–1.08)              | 1.01 (0.94–1.08)                      | 1.01 (0.94–1.08)                                  |
| <b>Fresh fruits</b>         | 3.40 (2.10)                                                                        | 3.39 (2.14)                                                                   | 1.00 (0.94–1.06)              | 1.00 (0.94–1.06)                      | 1.01 (0.95–1.07)                                  |
| <b>Dairy products</b>       | 3.63 (2.29)                                                                        | 3.33 (2.31)                                                                   | 0.94 (0.89–1.00)              | 0.95 (0.90–1.00)                      | 0.95 (0.90–1.01)                                  |

Abbreviations: adverse childhood experiences (ACEs), body mass index (BMI), confidence interval (CI), OR odds ratio (OR), standard deviation (SD).

a. Adjusted for age and school.

b. Additionally adjusted for BMI group, ACEs, and alcohol consumption.

**Table S3. Associations between Traditional South China Diet (TSCD) adherence and premenstrual disorders (PMDs) symptoms (z score).**

|                                     | No. of participants with symptoms <sup>a</sup> | Symptom score (Mean[SD]) | Fully adjusted $\beta$ (95%CI) <sup>b</sup> |
|-------------------------------------|------------------------------------------------|--------------------------|---------------------------------------------|
| <b>Overall symptoms</b>             | 1288                                           | 14.45 (12.01)            | -0.11 (-0.16 to -0.05)                      |
| <b>Affective symptoms</b>           | 1058                                           | 5.35 (5.19)              | -0.08 (-0.13 to -0.02)                      |
| Anxiety                             | 641                                            | 0.62 (0.77)              | -0.03 (-0.09 to 0.02)                       |
| Irritability                        | 759                                            | 0.79 (0.85)              | -0.07 (-0.12 to -0.02)                      |
| Emotional hypersensitivity          | 889                                            | 0.97 (0.89)              | -0.04 (-0.10 to 0.01)                       |
| Mood swings                         | 896                                            | 0.96 (0.87)              | -0.07 (-0.12 to -0.01)                      |
| Tearfulness                         | 512                                            | 0.55 (0.82)              | -0.05 (-0.10 to 0.01)                       |
| Angry outbursts                     | 503                                            | 0.50 (0.76)              | -0.07 (-0.12 to -0.01)                      |
| Increased desire to be alone        | 452                                            | 0.41 (0.67)              | -0.09 (-0.14 to -0.03)                      |
| Depression                          | 570                                            | 0.55 (0.74)              | -0.08 (-0.14 to -0.03)                      |
| <b>Physical/behavioral symptoms</b> | 1273                                           | 9.09 (12.01)             | -0.12 (-0.17 to -0.06)                      |
| Abdominal bloating                  | 735                                            | 0.72 (0.78)              | -0.07 (-0.12 to -0.01)                      |
| Breast tenderness                   | 635                                            | 0.64 (0.79)              | -0.06 (-0.11 to -0.01)                      |
| Dizziness                           | 235                                            | 0.21 (0.50)              | -0.06 (-0.11 to -0.00)                      |
| Headache                            | 219                                            | 0.21 (0.53)              | -0.07 (-0.12 to -0.01)                      |
| Hot flashes                         | 277                                            | 0.24 (0.53)              | -0.06 (-0.11 to -0.01)                      |
| Nausea                              | 206                                            | 0.18 (0.47)              | -0.07 (-0.12 to -0.02)                      |
| Swelling in the extremities         | 217                                            | 0.19 (0.48)              | -0.08 (-0.14 to -0.03)                      |
| Acne                                | 834                                            | 0.85 (0.82)              | -0.05 (-0.10 to 0.01)                       |
| Diarrhea                            | 699                                            | 0.71 (0.82)              | -0.08 (-0.13 to -0.03)                      |
| Food cravings                       | 614                                            | 0.65 (0.84)              | -0.08 (-0.13 to -0.03)                      |
| Palpitations                        | 208                                            | 0.18 (0.46)              | -0.05 (-0.11 to 0.00)                       |
| Increased appetite                  | 556                                            | 0.57 (0.78)              | -0.05 (-0.10 to 0.00)                       |
| Decreased appetite                  | 238                                            | 0.21 (0.51)              | -0.07 (-0.12 to -0.01)                      |
| Fatigue                             | 957                                            | 1.02 (0.85)              | -0.07 (-0.12 to -0.01)                      |
| Insomnia                            | 306                                            | 0.29 (0.62)              | -0.07 (-0.12 to -0.02)                      |
| Confusion                           | 542                                            | 0.52 (0.73)              | -0.07 (-0.12 to -0.01)                      |
| Forgetfulness                       | 309                                            | 0.28 (0.58)              | -0.07 (-0.12 to -0.02)                      |
| Abdominal cramping                  | 616                                            | 0.65 (0.86)              | -0.09 (-0.14 to -0.03)                      |
| Lower back pain                     | 728                                            | 0.77 (0.86)              | -0.09 (-0.14 to -0.03)                      |

Abbreviations: confidence interval (CI), standard deviation (SD).

a. Reporting symptoms were classified as none/minimal, mild, moderate, or severe, which were coded as 0, 1, 2, and 3, respectively.

**Table S4. Sensitivity analysis of the association between Traditional South China Diet (TSCD) adherence and premenstrual disorders (PMDs).**

|                                  | <b>Participants without PMDs, (N = 579)</b> | <b>Participants with PMDs, (N = 183)</b> | <b>Fully adjusted OR (95%CI)<sup>a</sup></b> |
|----------------------------------|---------------------------------------------|------------------------------------------|----------------------------------------------|
| <b>TSCD (z score), Mean (SD)</b> | 0.07 (1.00)                                 | -0.11 (0.98)                             | 0.83 (0.70–0.98)                             |
| <b>TSCD (quintiles), N (%)</b>   |                                             |                                          |                                              |
| Q1                               | 98 (18.2)                                   | 38 (21.7)                                | Ref.                                         |
| Q2                               | 99 (18.4)                                   | 41 (23.4)                                | 1.10 (0.65–1.87)                             |
| Q3                               | 110 (20.4)                                  | 35 (20.0)                                | 0.79 (0.46–1.36)                             |
| Q4                               | 112 (20.8)                                  | 34 (19.4)                                | 0.79 (0.45–1.36)                             |
| Q5                               | 120 (22.3)                                  | 27 (15.4)                                | 0.57 (0.32–0.99)                             |
| <i>P-for-trend</i>               |                                             |                                          | 0.028                                        |

Abbreviations: confidence interval (CI), OR odds ratio (OR), standard deviation (SD).

- a. Adjusted for age, school, categorical body mass index (BMI) group, adverse childhood experiences (ACEs), and alcohol consumption.
